# Supplementary material for: Bifunctional enhancement of photodetection and photovoltaic parameters in graphene/porous-Si heterostructures by employing interfacial hexagonal boron nitride and bathocuproine back-surface passivation layers
Source: Royal Society of Chemistry journal article supplement (doi:10.1039/d2tc03206f), 2022-01-01
Supplement: d2tc03206f1.pdf [file d2tc03206f1.pdf]

## **Supporting Information**

**for**

### **Bifunctional enhancement of photodetecting and photovoltaic parameters in graphene/porous-Si heterostructures by employing interfacial hexagonal boron nitride and bathocuproine back-surface passivation layer**

Chan Wook Jang<sup>1</sup>, Dong Hee Shin<sup>2</sup>, and Suk-Ho Choi<sup>1\*</sup>

<sup>1</sup>Department of Applied Physics, Institute of Natural Sciences, and Integrated Education  
Institute for Frontier Science and Technology (BK21 Four), Kyung Hee University, Yongin  
17104, Korea

<sup>2</sup>Department of Physics, Andong National University, Andong, Gyeongbuk 36729, South  
Korea

\*Corresponding author: [sukho@khu.ac.kr](mailto:sukho@khu.ac.kr)

**Table S1.** Photodetecting performance comparison of the TFSA-GR/h-BN/PSi/Si/BCP heterostructures with other self-powered GR/Si-heterojunction PDs previously-reported in literatures.

| Device Structure        | R (AW <sup>-1</sup> ) | EQE (%) | D*<br>(cm Hz <sup>1/2</sup> W <sup>-1</sup> ) | Decay time (ms) | Ref       |
|-------------------------|-----------------------|---------|-----------------------------------------------|-----------------|-----------|
| GR/h-BN/Si              |                       |         | $2.8 \times 10^{10}$                          | 1               | 17        |
| GR/ZnO/Si               | 0.38                  | 80      | $3.9 \times 10^{13}$                          | 0.5             | 36        |
| GR/Si                   | 0.51                  |         |                                               | 0.1             | 37        |
| MoO <sub>3</sub> -GR/Si |                       | 80      | $5.4 \times 10^{12}$                          |                 | 38        |
| Bi-layer GR/Si          | 0.41                  |         | $8 \times 10^{12}$                            | 0.1             | 39        |
| GR/Spiro-OMeTAD/Si      | 0.35                  |         | $8.7 \times 10^{10}$                          | 0.1             | 40        |
| TFSA-GR/h-BN/PSi        | 0.55                  | 88      | $2.6 \times 10^{10}$                          | 0.03            | This work |
| TFSA-GR/h-BN/PSi/BCP    | 0.58                  | 88      | $1 \times 10^{11}$                            | 0.04            |           |

**Table S2.** Photovoltaic parameters of the TFSA-GR/PSi heterostructures without h-BN and BCP, with only h-BN, and with both layers

| h-BN | BCP | V <sub>oc</sub><br>(V) | J <sub>sc</sub><br>(mA/cm <sup>2</sup> ) | FF<br>(%) | PCE<br>(%) |
|------|-----|------------------------|------------------------------------------|-----------|------------|
| X    | X   | 0.494                  | 29.95                                    | 60.76     | 8.99       |
| O    | X   | 0.513                  | 32.98                                    | 72.38     | 12.25      |
| O    | O   | 0.525                  | 33.48                                    | 78.02     | 13.71      |

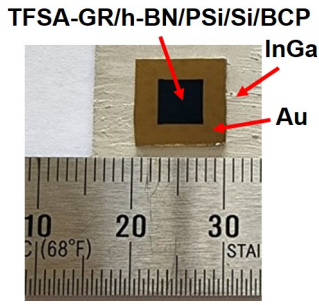

**Fig. S1.** Optical microscopic image of a typical TFSA-GR/h-BN/PSi/Si/BCP PD.

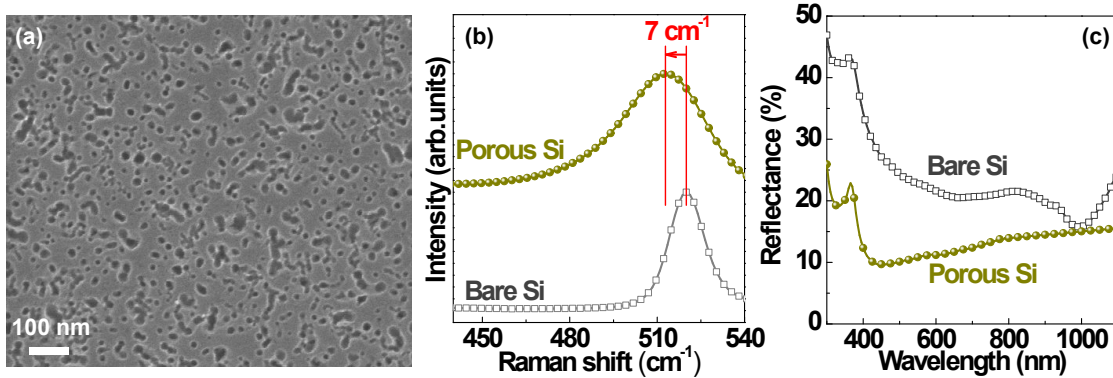

**Fig. S2.** FE-SEM images of (a) porous Si. (b) Raman and (c) reflectance spectra of bare Si and porous Si.

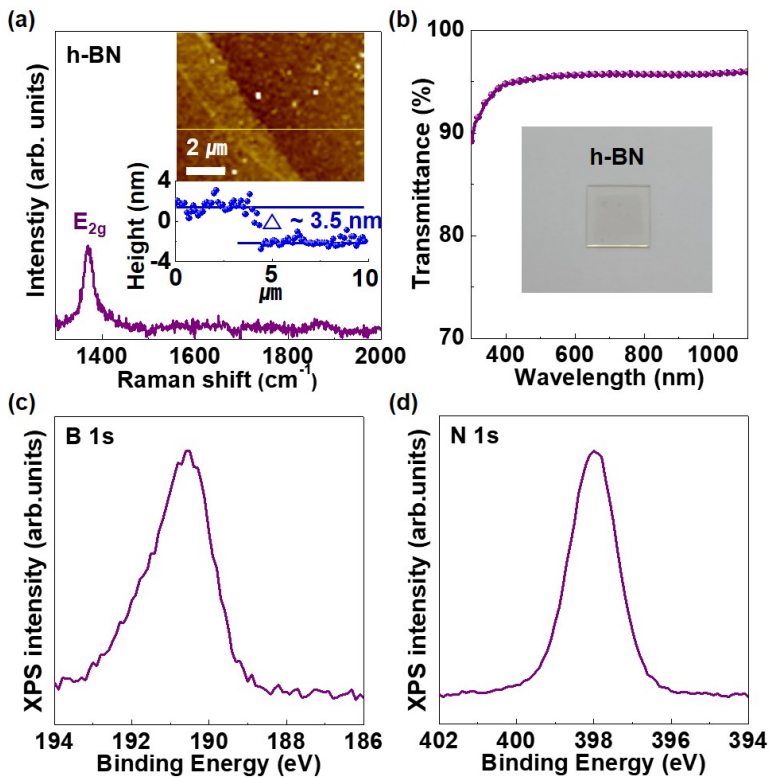

**Fig. S3.** (a) Raman spectrum of the h-BN layer. The inset shows the AFM topographic image and height profile of the h-BN sheet. (b) Transmittance of the h-BN sheet. The inset image shows the excellent transparency of the h-BN on quartz substrate. (c) and (d) XPS spectra of the h-BN sheet.

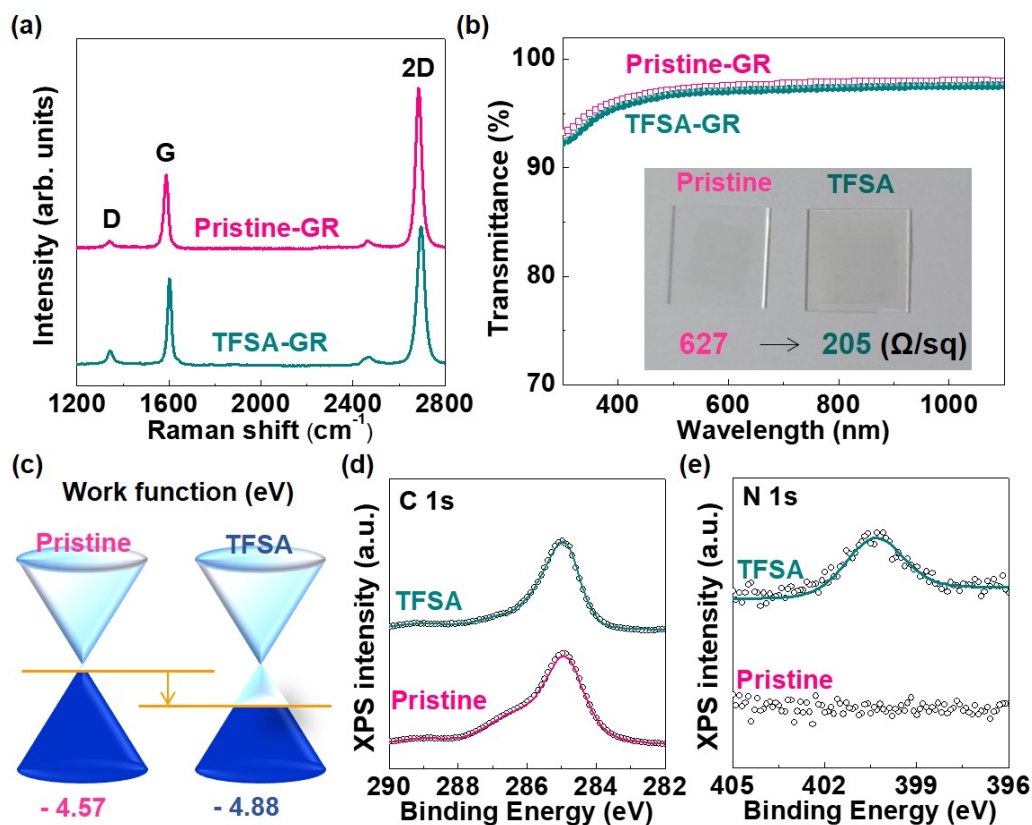

**Fig. S4.** (a) Raman spectra, (b) transmittance spectra, and (c) work function of the pristine GR and TFSA-GR. The inset in (b) shows the variation of the real image by the TFSA doping. (c) Work functions of pristine GR and TFSA-GR. (d) and (e) XPS spectra of the pristine GR and TFSA-GR.

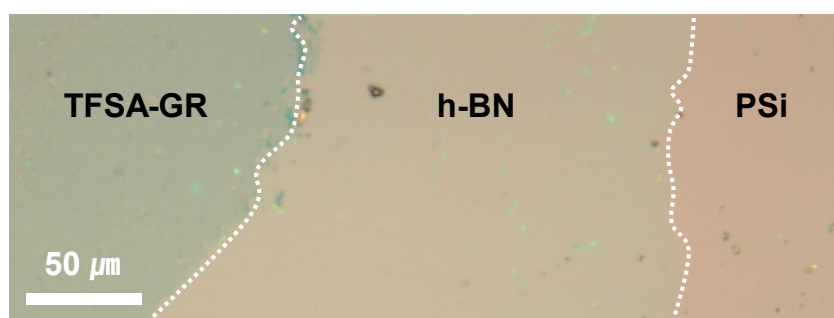

**Fig. S5.** Optical microscopic image showing the uniformity of the 3 materials: TFSA-GR, h-BN, and PSi near the interfaces in the overlapped structure.

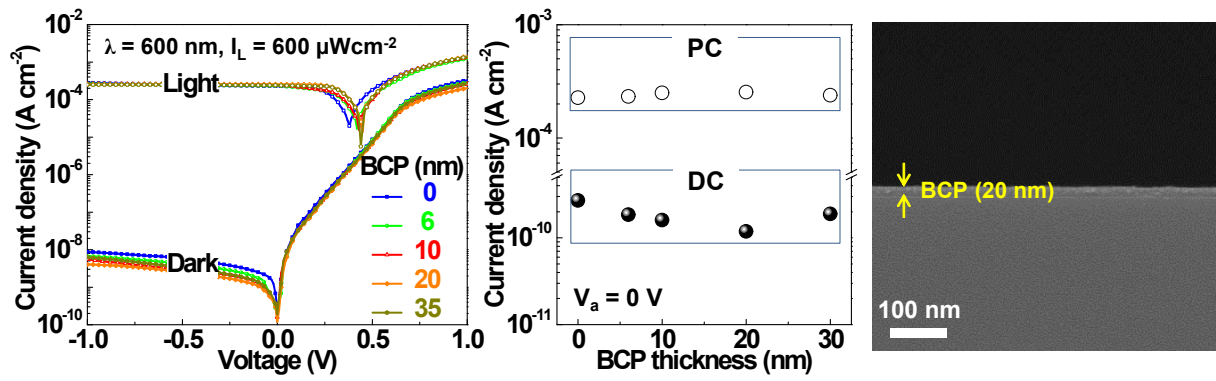

Fig. S6. Thickness-dependent photo/dark current density-voltage curves and PC/DC at 0 V for various BCP thicknesses, and a FE-SEM image showing the optimum thickness of the PD.

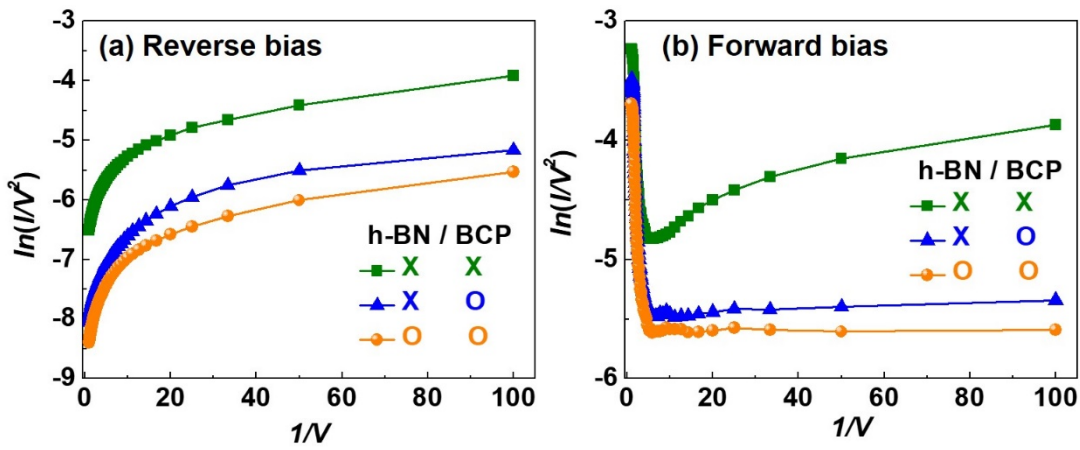

Fig. S7. Fowler-Nordheim-tunneling plots ( $\ln(I/V^2)$  vs  $1/V$ ) (a) under reverse bias and (b) under forward bias.

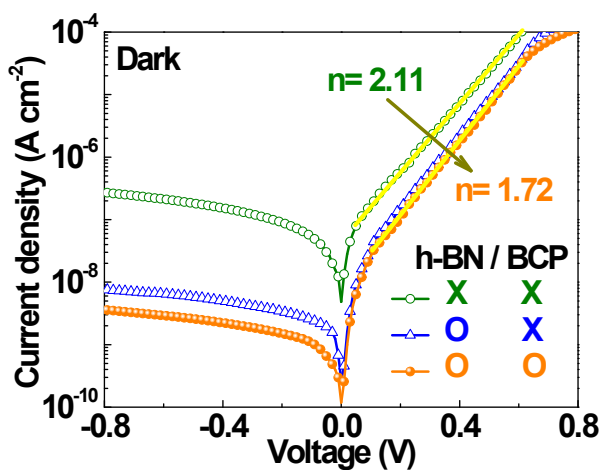

Fig. S8. Dark  $J$ - $V$  curves of the heterostructures without h-BN and BCP, with only h-bN, and with both layers. The extracted ideality factors ( $n$ ) are indicated.

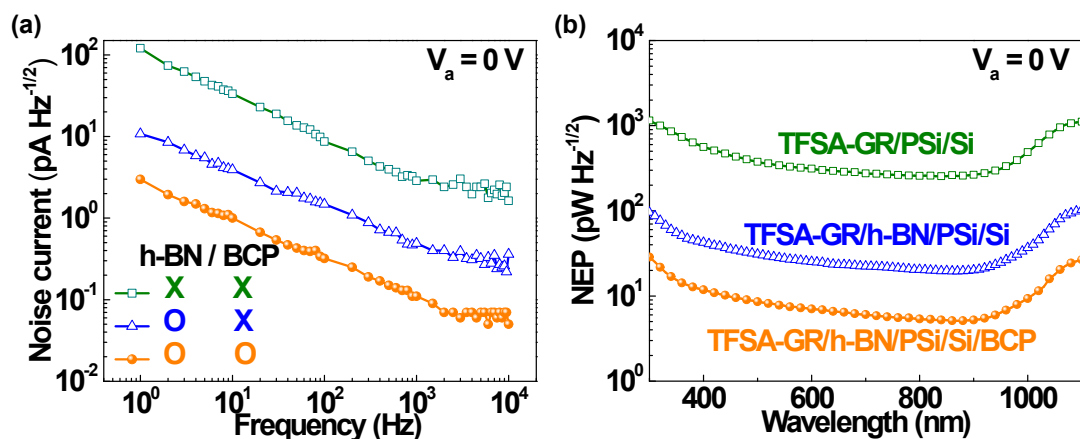

Fig. S9. (a) Frequency-dependent noise current and (b)  $\lambda$ -dependent NEP at zero bias for the heterostructures without h-BN and BCP, with only h-bN, and with both layers.

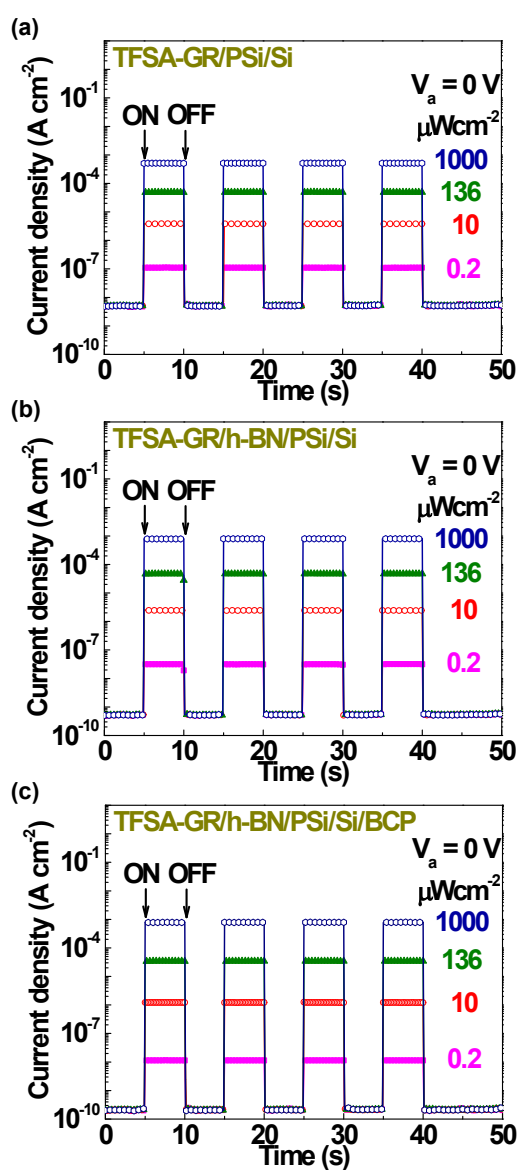

Fig. S10. Repetitive on/off switching current density characteristics for various lighting power for the heterostructures without h-BN and BCP, with only h-bN, and with both layers at zero bias.

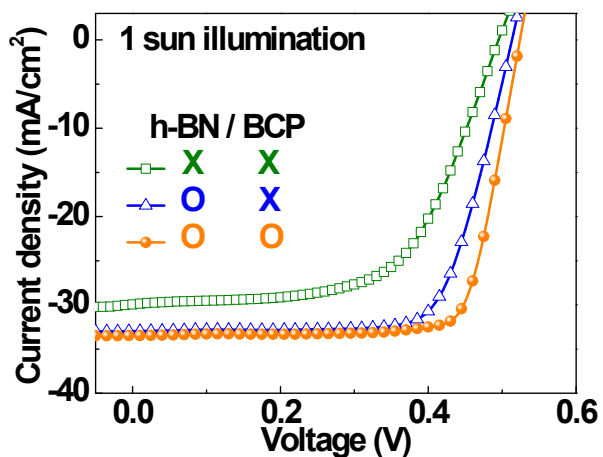

Fig. S11.  $J$ - $V$  curves of the heterostructures without h-BN and BCP, with only h-BN, and with both layers under illumination of 1sun ( $100 \text{ mW cm}^{-2}$  AM 1.5G) in air.

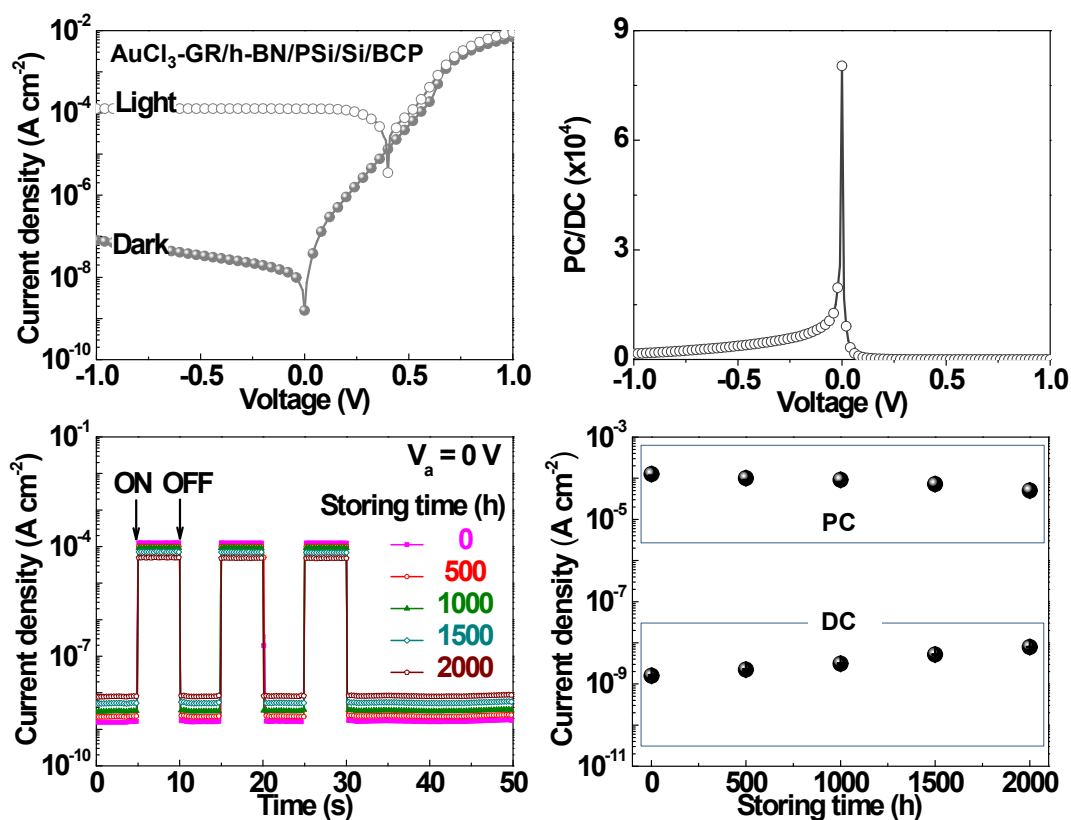

Fig. S12. Dark/photo current density-voltage curves, bias-dependent PC/DC ratio, temporal changes of the repeated on/off PC switching behaviors and the PC/DC under ambient conditions during 2000 h for a typical  $\text{AuCl}_3\text{-GR/h-BN/PSi/Si/BCP}$ .
